# Supplementary material
Source: PubMed Central journal article supplement (PMC7291702)
Supplement: NIHMS1593296-supplement-Supplementary_data.pdf [file NIHMS1593296-supplement-Supplementary_data.pdf]

## Supporting Information

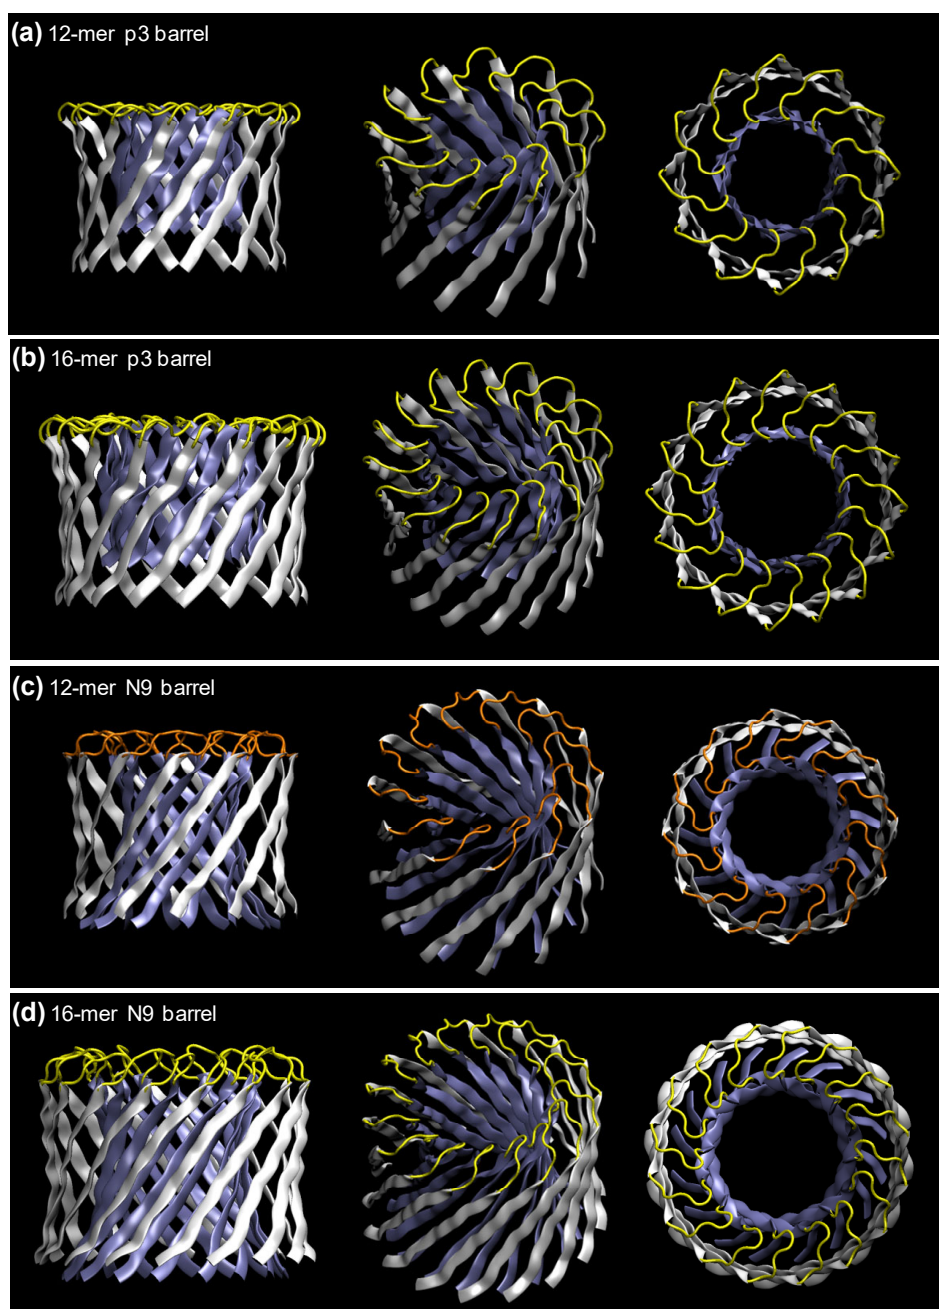

**Fig. S1.** Building smaller A $\beta$  barrels. Conceptual design of annular structure for the (a) 12-mer p3, (b) 16-mer p3, (c) 12-mer N9, and (d) 16-mer N9 barrels embedded in the lipid bilayers. In

the peptide, the N-terminal  $\beta$ -strands are shown in cyan, the C-terminal  $\beta$ -strands are shown in white, and the loops connecting two strands are shown in yellow.

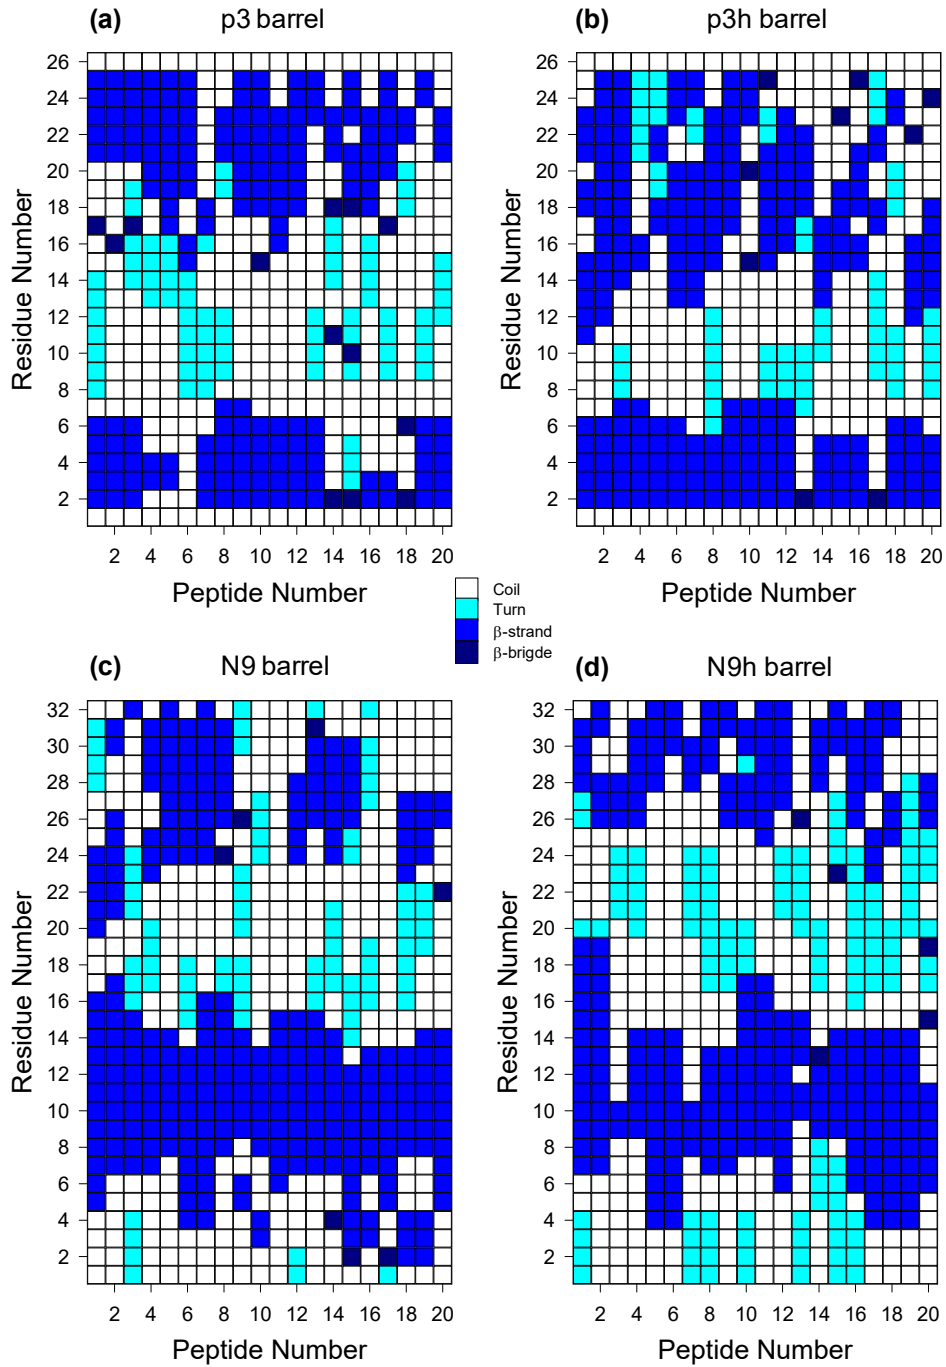

**Fig. S2.** The  $\beta$ -sheet structures in the barrels. The description of secondary structure by STRIDE for the 20-mer (a) p3, (b) p3h, (c) N9, and (d) N9h barrels.

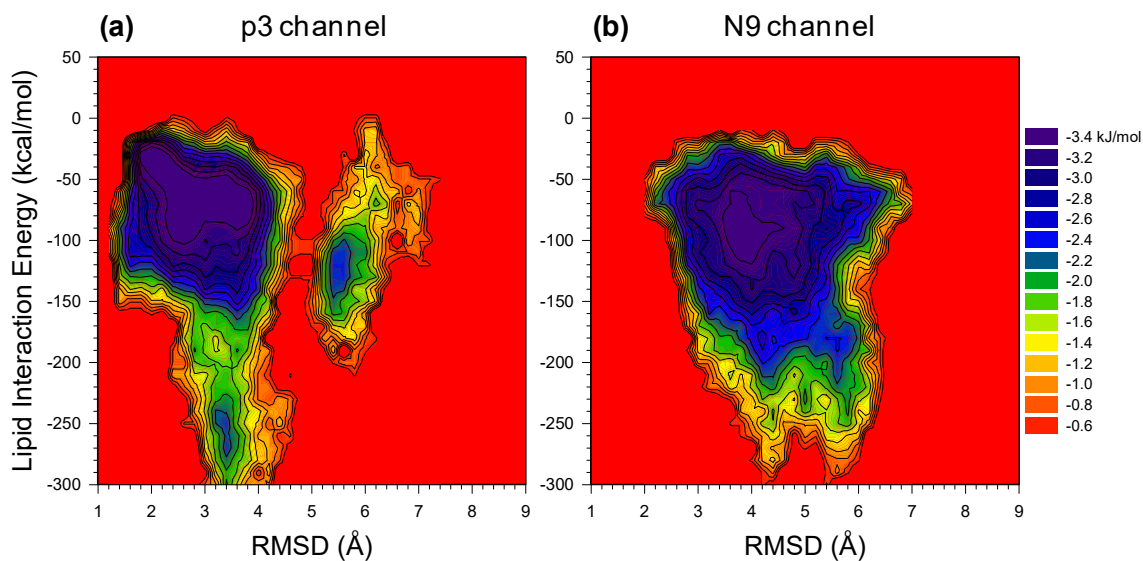

**Fig. S3.** Comparison of lipid interaction energies to A $\beta$  channels. The relative free energy surface for the peptide-lipid interaction as a function of the root mean squared deviation (RMSD) from the starting point for the 20-mer (a) p3 and (b) N9 channels from previous simulations.

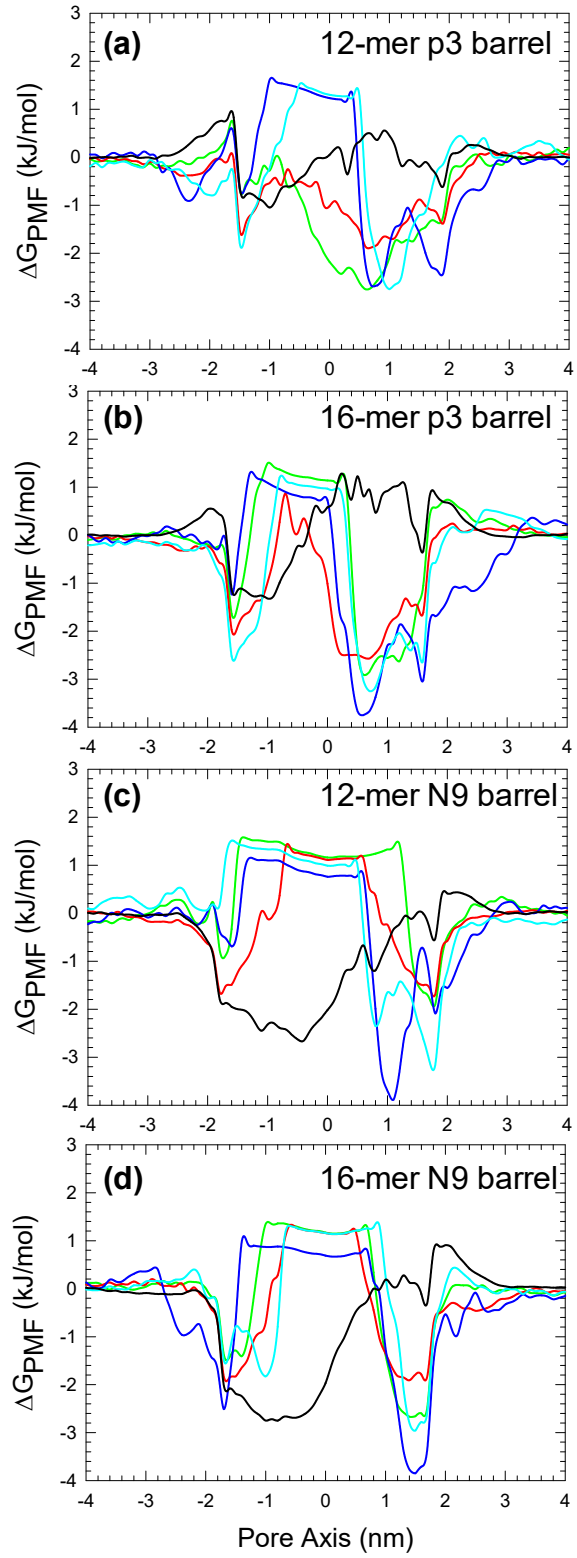

**Fig. S4.** Ion-permeable A $\beta$  barrels. Potential of mean force (PMF),  $\Delta G_{\text{PMF}}$ , calculated using the equation  $\Delta G_{\text{PMF}} = -k_B T \ln(\rho_z / \rho_{\text{bulk}})$ , where  $k_B$  is the Boltzmann constant,  $T$  is the simulation temperature,  $\rho_z$  is the ion density at the position  $z$  along the pore axis, and  $\rho_{\text{bulk}}$  is the ion density in the bulk region, representing the relative free energy profile for Mg<sup>2+</sup> (green lines), K<sup>+</sup> (red lines), Ca<sup>2+</sup> (blue lines), Zn<sup>2+</sup> (cyan lines), and Cl<sup>-</sup> (black lines) as a function of the distance along the pore center axis for the (a) 12-mer p3, (b) 16-mer p3, (c) 12-mer N9, and (d) 16-mer N9 barrels.
